# Supplementary figures and images for: CDKN2A Gene Mutations: Implications for Hereditary Cancer Syndromes
Source: MDPI journal article supplement (doi:10.3390/biomedicines11123343), 2023-12-18

## Patient 1

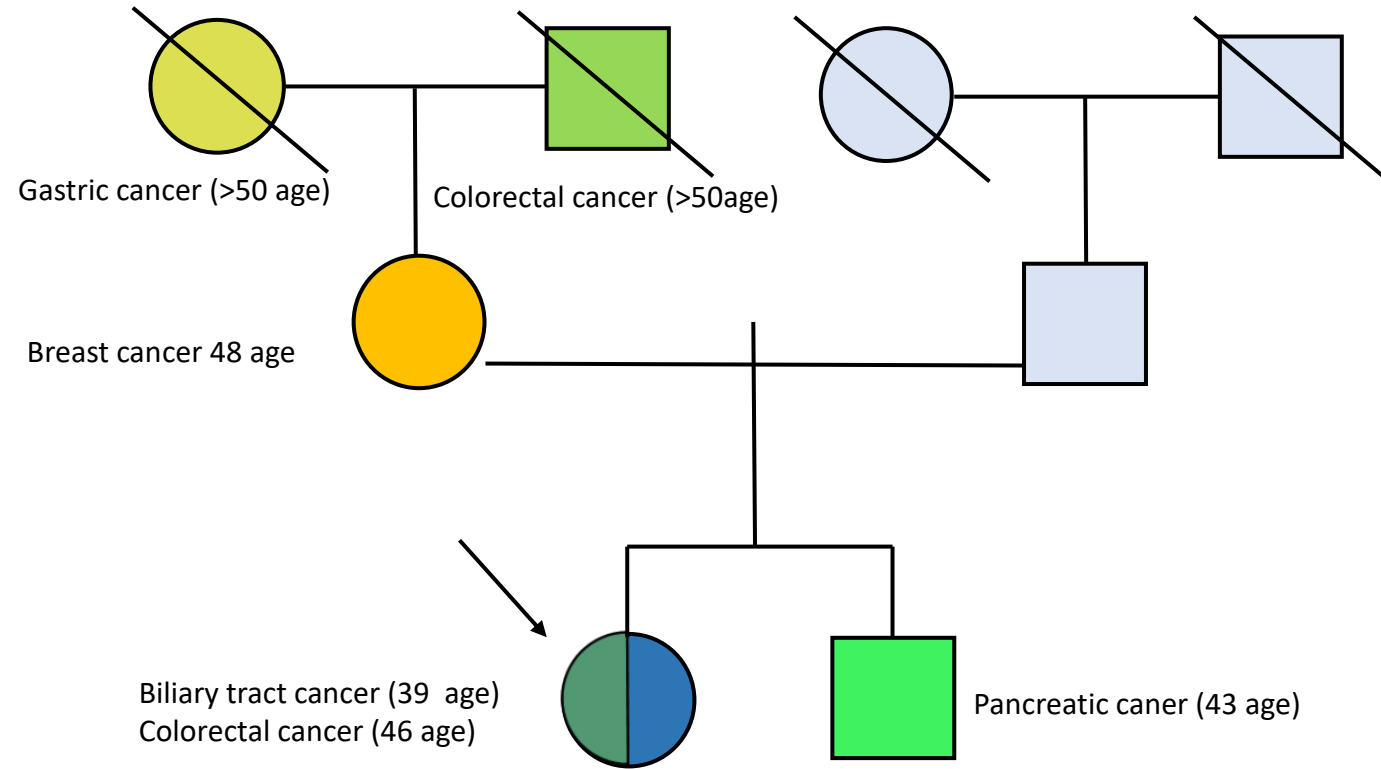

Patient 2

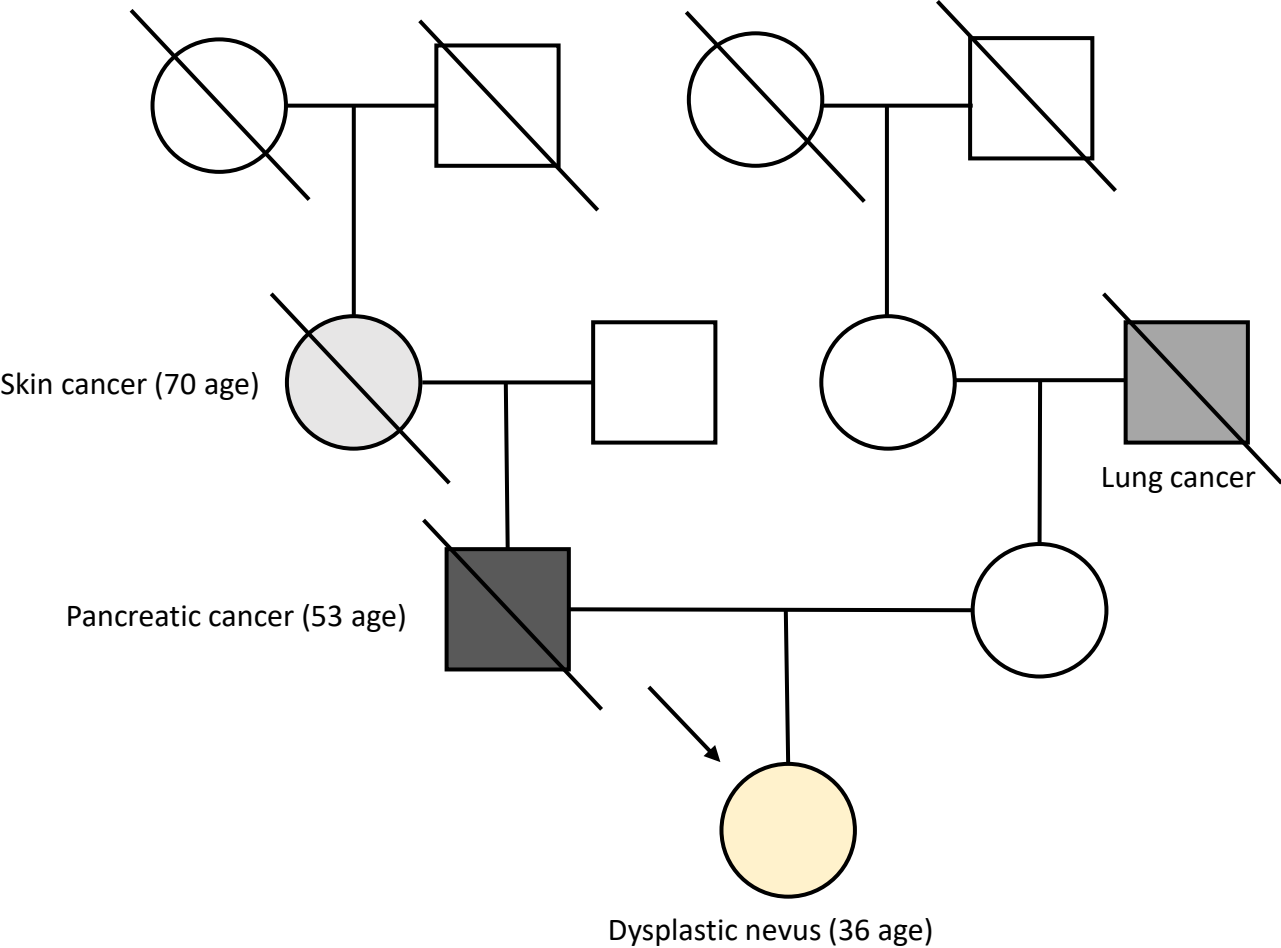

Patient 3

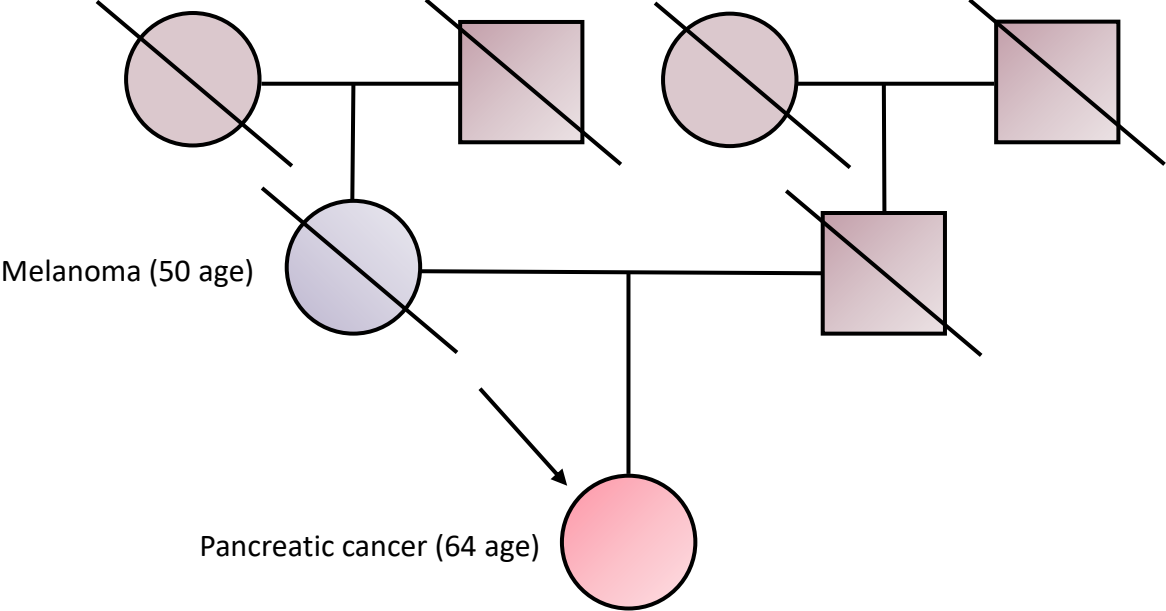

Patient 4

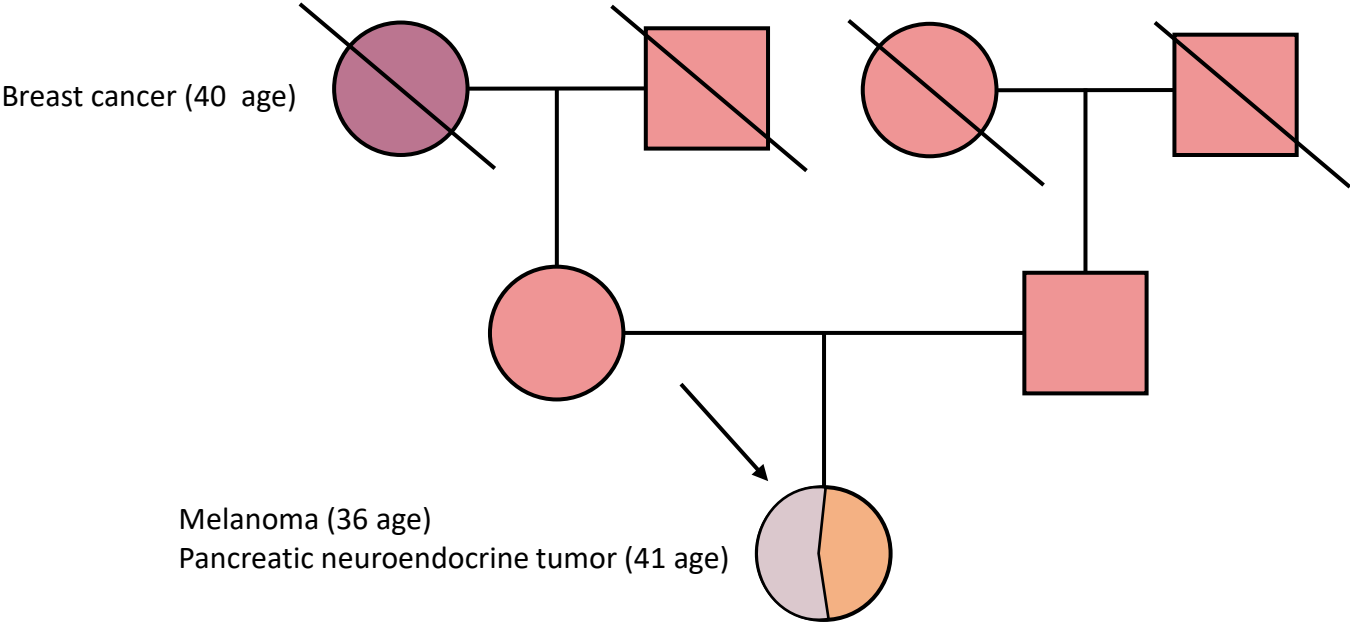

Patient 5

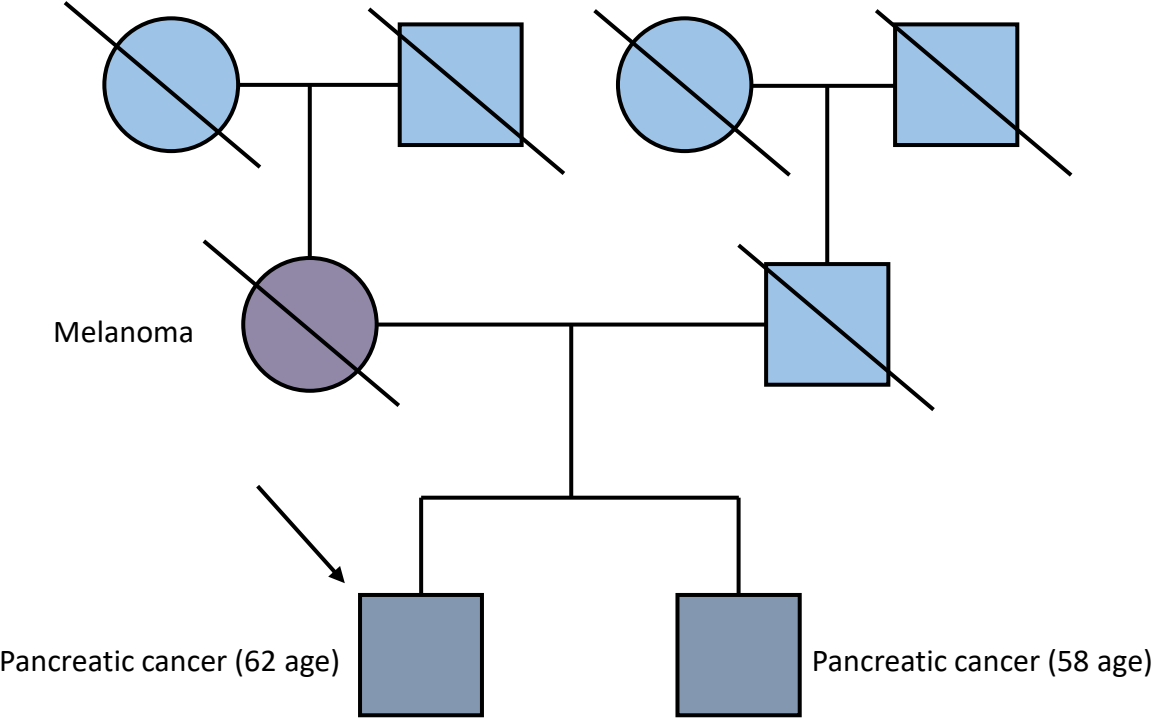

Patient 6

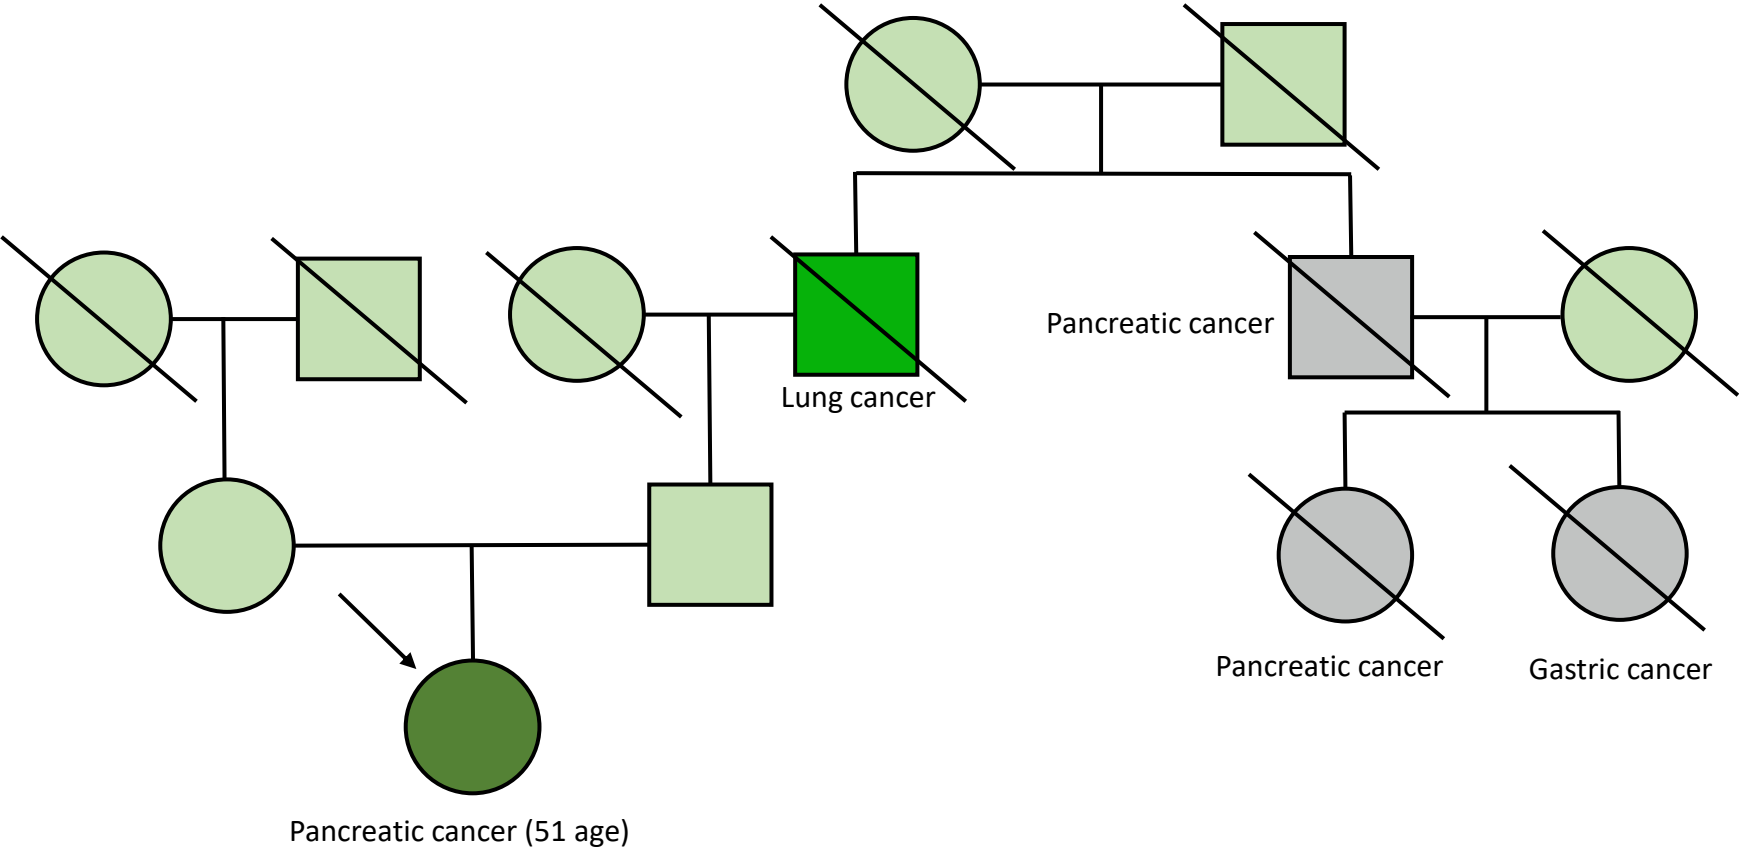

Supplement: s1 [file s1]
